# Supplementary material for: In‐vitro spermatogenesis through testis modelling: Toward the generation of testicular organoids
Source: PubMed Central journal article supplement (PMC7496450; doi:10.1111/andr.12741), 2020-01-09
Supplement: ANDR-8-879-s001.pdf [file ANDR-8-879-s001.pdf]

**Supplementary table 1** Overview of different combinations of 2D culture methodology and signaling factors on best outcomes per study

| AUTHORS                 | DATE | START                         | CULTURE METHODOLOGY               | TIME IN CULTURE | CELL REORGANIZATION    | SPERMATOGENESIS | BASAL MEDIUM | SERUM   | GONADOTROPHINS | TGFβ-SUPERFAMILY | GROWTH FACTORS                                                                                    | VITAMIN A | OTHER INGREDIENTS                                         |
|-------------------------|------|-------------------------------|-----------------------------------|-----------------|------------------------|-----------------|--------------|---------|----------------|------------------|---------------------------------------------------------------------------------------------------|-----------|-----------------------------------------------------------|
| Tung and Fritz          | 1980 | 20 dpp rat SCs and PTMCs      | Non-coated                        | 90 days         | Mounds                 | N/A             | MEM          | 10% FCS | 100 ng/ml FSH  | -                | -                                                                                                 | -         | -                                                         |
| Tung and Fritz          | 1984 | 20 dpp rat SC                 | ST biomatrix                      | 3 weeks         | Cord-like structures   | N/A             | MEM          | -       | -              | -                | -                                                                                                 | -         | -                                                         |
| Tung and Fritz          | 1986 | 20 dpp rat SCs and PTMCs      | Collagen I, IV, LN or fibronectin | 16 days         | Cord-like structures   | N/A             | MEM          | 10% FCS | -              | -                | -                                                                                                 | -         | -                                                         |
| Tung and Fritz          | 1987 | 20 dpp rat SCs and PTMCs      | Non-coated                        | 18 days         | Cord-like structures   | N/A             | MEM          | 10% FCS | -              | -                | -                                                                                                 | -         | -                                                         |
| Schlatt et al.          | 1996 | 7 dpp rat SCs and PTMCs       | LN                                | 7 days          | Mounds                 | N/A             | DMEM         | -       | 200 ng/ml FSH  | -                | -                                                                                                 | -         | -                                                         |
| Van der Wee and Hofmann | 1999 | 10 dpp immortalized mouse SCs | GFR-Matrigel                      | 5 days          | Tubule-like structures | N/A             | DMEM         | 10% FCS | -              | -                | -                                                                                                 | -         | 1 mM sodium pyruvate<br>2 mM glutamine<br>100 uM NEAA     |
| Mackay et al.           | 1999 | Embryonic mouse SCs           | Matrigel                          | 7 days          | Cord-like structures   | N/A             | DMEM         | 10% FCS | -              | -                | -                                                                                                 | -         | -                                                         |
| Willerton et al.        | 2004 | Embryonic mouse SCs           | Matrigel                          | 7 days          | Cord-like structures   | N/A             | DMEM         | 10% FCS | -              | -                | 10 ng/ml FGF9                                                                                     | -         | -                                                         |
| El Ramy et al.          | 2005 | 20 dpp rat SCs and PTMCs      | Non-coated                        | 5 days          | Cord-like structures   | N/A             | DMEM/F12     | 10% FCS | -              | -                | 50 ng/ml FGF9<br>50 ng/ml FGF2<br>50 ng/ml PDGF                                                   | -         | -                                                         |
| Mincheva et al.         | 2018 | Adult human TCs               | Glass                             | 3 weeks         | Cord-like structures   | N/A             | DMEM         | -       | -              | -                | -                                                                                                 | -         | 1% NEAA                                                   |
| Von Kopylow et al.      | 2018 | Adult human TCs               | Non-coated                        | 3 months        | Cord-like structures   | ES, SG loss     | DMEM         | 15% KSR | -              | 100 ng/ml GDNF   | 40 ng/ml EGF<br>20 ng/ml FGF1<br>20 ng/ml FGF2<br>20 ng/ml FGF9<br>100 ng/ml GDNF<br>10 ng/ml IGF | -         | 0.1 mM 2-Mercaptoethanol<br>2 mM glutamine<br>0.1 mM NEAA |

dpp; days postpartum; ES, elongates spermatids; GFR, growth factor reduced; LN, laminin; NEAA, non-essential amino-acids; PTMC, peritubular myoid cells; SC, Sertoli cells; SG, spermatogonia; ST, seminiferous tubule; TC, testicular cells
