# Supplementary material for: In‐vitro spermatogenesis through testis modelling: Toward the generation of testicular organoids
Source: PubMed Central journal article supplement (PMC7496450; doi:10.1111/andr.12741), 2020-01-09
Supplement: ANDR-8-879-s002.pdf [file ANDR-8-879-s002.pdf]

**Supplementary table 2** Overview of different combinations of 3D culture methodology and signaling factors on best outcomes per study

| AUTHORS           | DATE | START                                 | CULTURE METHODOLOGY                      | TIME IN CULTURE | CELL REORGANIZATION    | SPERMATOGENESIS | BASAL MEDIUM | SERUM   | GONADOTROPHINS                                                                   | TGFB-SUPERFAMILY | GROWTH FACTORS                  | VITAMIN A                                                       | OTHER INGREDIENTS                                                                                                                                                                                                                  |
|-------------------|------|---------------------------------------|------------------------------------------|-----------------|------------------------|-----------------|--------------|---------|----------------------------------------------------------------------------------|------------------|---------------------------------|-----------------------------------------------------------------|------------------------------------------------------------------------------------------------------------------------------------------------------------------------------------------------------------------------------------|
| Zenzen and Engel  | 1981 | 8, 10, 18, 25, 35, 40, 90 dpp rat TCs | Rotation culture                         | -               | Tubule-like structures | N/A             | MEM          | -       | -                                                                                | -                | -                               | -                                                               | -                                                                                                                                                                                                                                  |
| Hadley et al.     | 1985 | 10 dpp rat Sertoli cells              | Matrigel                                 | 5 weeks         | Cord-like structures   | PaS             | DMEM         | -       | 100 ng/ml FSH<br>10 <sup>-8</sup> M testosterone<br>10 <sup>-8</sup> M estradiol | -                | 10 ng/ml EGF<br>2 ug/ml insulin | 50 ng/ml vitamin A                                              | 5 ug/ml transferrin<br>200 ng/ml vitamin E<br>10 <sup>-6</sup> M hydrocortisone<br>2 mM glutamine<br>5 ng/ml sodium selenate<br>1 mM sodium pyruvate<br>22 mM sodium lactate<br>3 mg/ml cytosine arabinoside<br>50 ng/ml vitamin C |
| Hadley et al.     | 1990 | 10 dpp rat SCs                        | Matrigel                                 | 3 weeks         | Cord-like structures   | N/A             | DMEM         | -       | 100 ng/ml FSH<br>10 <sup>-8</sup> M testosterone<br>10 <sup>-8</sup> M estradiol | -                | 10 ng/ml EGF<br>2 ug/ml insulin | 50 ng/ml vitamin A                                              | 5 ug/ml transferrin<br>200 ng/ml vitamin E<br>10 <sup>-6</sup> M hydrocortisone<br>2 mM glutamine<br>5 ng/ml sodium selenate<br>1 mM sodium pyruvate<br>22 mM sodium lactate<br>3 mg/ml cytosine arabinoside<br>50 ng/ml vitamin C |
| Yu et al.         | 2005 | 5 dpp rat SCs and SG                  | Matrigel overlay                         | 2 weeks         | Cellular aggregates    | N/A             | MEM          | -       | -                                                                                | -                | -                               | -                                                               | 0.1 mM NEAA<br>1 mM sodium pyruvate<br>3 mM sodium lactate<br>1% ITS                                                                                                                                                               |
| Gassei et al.     | 2006 | 7 dpp rat TCs                         | Matrigel                                 | 5 weeks         | Tubule-like structures | N/A             | DMEM         | -       | -                                                                                | -                | -                               | -                                                               | NEAA                                                                                                                                                                                                                               |
| Lee et al.        | 2006 | 18 dpp rat TCs                        | CGM                                      | 22 days         | Cellular aggregates    | RS              | DMEM/F12     | 10% FCS | 2.5 x 10 <sup>-5</sup> IU FSH<br>10 <sup>-7</sup> M testosterone                 | -                | -                               | 3.3 x 10 <sup>-7</sup> M RA<br>3.3 x 10 <sup>-7</sup> M retinol | 10 mg/ml ITS<br>10 <sup>-4</sup> M vitamin C<br>10 ug/ml vitamin E<br>1 mM pyruvate                                                                                                                                                |
| Lee et al.        | 2007 | Adult human TCs                       | Collagen                                 | 12 days         | Cellular aggregates    | SpT             | DMEM/F12     | 10% FCS | 100 mIU FSH<br>10 <sup>-7</sup> M testosterone<br>10 <sup>-7</sup> M DHT         | -                | -                               | 3.3 x 10 <sup>-7</sup> M RA<br>3.3 x 10 <sup>-7</sup> M retinol | 10 mg/ml ITS<br>10 <sup>-4</sup> M vitamin C<br>10 ug/ml vitamin E<br>1 mM pyruvate                                                                                                                                                |
| Gassei et al.     | 2008 | 7 dpp rat TCs                         | Matrigel                                 | 9 days          | Cellular aggregates    | N/A             | DMEM         | -       | 10 - 100 ng/ml FSH                                                               | -                | -                               | -                                                               | 1% NEAA<br>10 ng/ml - 100 ng/ml NTF3                                                                                                                                                                                               |
| Stukenborg et al. | 2008 | 7-10 dpp mouse TCs                    | Soft agarose                             | 15 days         | Cellular aggregates    | RS              | DMEM/F12     | -       | -                                                                                | -                | -                               | -                                                               | -                                                                                                                                                                                                                                  |
| Stukenborg et al. | 2009 | 7-10 dpp mouse TCs                    | Soft agarose                             | 31 days         | Cellular aggregates    | ES              | DMEM/F12     | -       | 5 IU/l hCG<br>5 IU/l FSH                                                         | -                | -                               | -                                                               | -                                                                                                                                                                                                                                  |
| Stukenborg et al. | 2009 | 7-9 dpp mouse TCs                     | Methylcellulose                          | 31 days         | Cellular aggregates    | ES              | DMEM/F12     | -       | 5 IU/l hCG<br>5 IU/l FSH                                                         | -                | -                               | -                                                               | -                                                                                                                                                                                                                                  |
| yu et al.         | 2009 | 5 dpp rat SCs and SG                  | Matrigel                                 | 7 days          | Cellular aggregates    | N/A             | MEM          | -       | -                                                                                | -                | -                               | -                                                               | -                                                                                                                                                                                                                                  |
| Legendre et al.   | 2010 | 18 dpp rat TCs                        | Matrigel, collagen I (bicameral chamber) | 22 days         | Tubule-like structures | RS              | DMEM/F12     | 5% FCS  | 100 mIU FSH<br>10 <sup>-7</sup> M testosterone                                   | -                | -                               | 3.3 x 10 <sup>-7</sup> M retinol                                | 6.25 ug/ml ITS<br>10 <sup>-4</sup> M vitamin C<br>10 ug/ml vitamin E<br>1 mM pyruvate                                                                                                                                              |
| Gassei et al.     | 2010 | 7 dpp rat TCs                         | Matrigel                                 | 9 days          | Tubule-like structures | N/A             | DMEM         | -       | -                                                                                | -                | -                               | -                                                               | 1% NEAA                                                                                                                                                                                                                            |

|                    |      |                                                     |                                                                   |         |                                        |                    |                                |                  |                                                |               |                                                                                    |                                                                 |                                                                                                                                                                                                                                                                                                                                                                           |
|--------------------|------|-----------------------------------------------------|-------------------------------------------------------------------|---------|----------------------------------------|--------------------|--------------------------------|------------------|------------------------------------------------|---------------|------------------------------------------------------------------------------------|-----------------------------------------------------------------|---------------------------------------------------------------------------------------------------------------------------------------------------------------------------------------------------------------------------------------------------------------------------------------------------------------------------------------------------------------------------|
| Lee et al.         | 2011 | 18 dpp, 30 dpp rat TCs                              | PLGA                                                              | 18 days | Cellular aggregates                    | ES                 | DMEM/F12                       | 10% FCS          | 100 mIU FSH<br>10 <sup>-7</sup> M testosterone | -             | -                                                                                  | 3.3 x 10 <sup>-7</sup> M RA<br>3.3 x 10 <sup>-7</sup> M retinol | 10 mg/ml ITS<br>10 <sup>-4</sup> M vitamin C<br>10 ug/ml vitamin E<br>1 mM pyruvate                                                                                                                                                                                                                                                                                       |
| Abu elhija et al.  | 2012 | 7 dpp mouse TCs                                     | SACS                                                              | 4 weeks | Cellular aggregates                    | ES                 | RPMI-1640                      | 20% FCS          | -                                              | -             | -                                                                                  | -                                                               | -                                                                                                                                                                                                                                                                                                                                                                         |
| Yokonishi et al.   | 2013 | 0.5-5.5 dpp mouse TCs                               | Cellular aggregates                                               | 61 days | Tubule-like structures                 | RS                 | Alpha-MEM                      | 10% KSR          | -                                              | 10 ng/ml GDNF | -                                                                                  | -                                                               | -                                                                                                                                                                                                                                                                                                                                                                         |
| Pan et al.         | 2013 | 7 dpp rat TCs                                       | Nanotubes (PDMS)                                                  | 15 days | Cord-like structures                   | N/A                | DMEM                           | -                | -                                              | -             | -                                                                                  | -                                                               | -                                                                                                                                                                                                                                                                                                                                                                         |
| Mäkelä et al.      | 2014 | <10 dpp to 17 dpp mouse ST                          | Plastic                                                           | 8 weeks | Cord-like structures                   | N/A                | DMEM/F12                       | 15% FCS          | 10 ng/ml FSH                                   | 10 ng/ml GDNF | -                                                                                  | -                                                               | Angiotensin II                                                                                                                                                                                                                                                                                                                                                            |
| Zhang et al.       | 2014 | 6 dpp mouse TCs                                     | Collagen                                                          | 3 weeks | Tubule-like structures                 | PaS                | RPMI-1640                      | 10% KSR          | -                                              | -             | -                                                                                  | -                                                               | -                                                                                                                                                                                                                                                                                                                                                                         |
| Reuter et al.      | 2014 | 7 dpp rat TCs                                       | Collagen sponges                                                  | 35 days | Cellular aggregates                    | None               | DMEM                           | -                | 5 IU/l hCG<br>5 IU/l FSH                       | -             | -                                                                                  | -                                                               | Glutamax                                                                                                                                                                                                                                                                                                                                                                  |
| Reda et al.        | 2014 | 7 dpp rat TCs                                       | SACS                                                              | 31 days | Cellular aggregates                    | PaS                | DMEM<br>DMEM/F12<br>F12<br>MEM | -                | 5 IU/l hCG<br>5 IU/l FSH                       | -             | -                                                                                  | -                                                               | Glutamax                                                                                                                                                                                                                                                                                                                                                                  |
| Kulibin et al.     | 2016 | 4-6 dpp, 8-12 dpp mouse SCs                         | Collagen                                                          | 10 days | Tubule-like structures                 | N/A                | Alpha-MEM/F12                  | 5% FCS           | -                                              | -             | -                                                                                  | -                                                               | -                                                                                                                                                                                                                                                                                                                                                                         |
| Pendergraft et al. | 2017 | Adult human TCs (immortalized SC, Leydig cells)     | Hanging drop, ultra-low attachment U-plates + 1 ug/ml ECM extract | 23 days | Cellular aggregates                    | Haploid germ cells | StemPro-34                     | 30% FCS          | 2.5 x 10 <sup>-5</sup> IU FSH                  | 10 ng/ml GDNF | 100 ng/mL SCF<br>10 ng/ml FGF2<br>20 ng/ml EGF<br>25 ug/ml insulin<br>10 ng/ml LIF | 2 uM RA                                                         | 100 ug/ml transferrin<br>60 uM putrescine<br>30 nM sodium selenite<br>6 mg/ml D-(+)-glucose<br>30 ug/ml pyruvic acid<br>1 u/ml DL-lactic acid<br>5 mg/ml bovine albumin<br>2 mM glutamine<br>5 x 10 <sup>-5</sup> 2-mercaptoethanol<br>Vitamin solution<br>NEAA<br>10 <sup>-4</sup> M ascorbic acid<br>10 ug/ml d-biotin<br>30 ng/ml β-estradiol<br>60 ng/ml progesterone |
| Alves-Lopes et al. | 2017 | 5-8 dpp, 20 dpp, 60 dpp TCs                         | Matrigel (3 LGS)                                                  | 21 days | Tubule-like structures                 | Proliferative SG   | Alpha-MEM                      | 10% KSR          | -                                              | -             | -                                                                                  | 10 nM - 10 uM RA                                                | 10 <sup>-7</sup> M melatonin                                                                                                                                                                                                                                                                                                                                              |
| Zhang et al.       | 2017 | 6 dpp rat TCs                                       | Matrigel overlay                                                  | 12 days | Cord-like structures                   | Meiotic initiation | DMEM/F12                       | 10% KSR          | -                                              | -             | -                                                                                  | -                                                               | -                                                                                                                                                                                                                                                                                                                                                                         |
| Baert et al.       | 2017 | Adult & adolescent human TCs                        | DTM (human)                                                       | 1 month | Cellular aggregates                    | Proliferative SG   | KODMEM                         | 10% xenofree KSR | 5 IU/l hCG<br>5 IU/l FSH                       | -             | -                                                                                  | -                                                               | 1x Glutamax                                                                                                                                                                                                                                                                                                                                                               |
| Vermeulen et al.   | 2018 | Adult human SCs                                     | DTM (porcine)                                                     | 18 days | Cellular aggregates                    | None               | DMEM/F12                       | 5% FCS           | -                                              | -             | -                                                                                  | -                                                               | 15 mM HEPES<br>2.5 mM glutamine                                                                                                                                                                                                                                                                                                                                           |
| Topraggaleh et al. | 2018 | 3-5 dpp mouse TCs                                   | DTM (ram)                                                         | 30 days | Cellular aggregates                    | RS                 | Alpha-MEM                      | 10% KSR          | 5 IU/l hCG<br>5 IU/l FSH                       | -             | -                                                                                  | 10 <sup>-6</sup> M RA                                           | -                                                                                                                                                                                                                                                                                                                                                                         |
| Sakib et al.       | 2019 | 8-10 dpp mouse TCs, 6 months & 5 year old human TCs | Microwell (+ 1:100 Matrigel)                                      | 7 days  | Cellular aggregates (reverse polarity) | N/A                | DMEM/F12                       | -                | -                                              | -             | 20 ng/ml EGF<br>10 ug/ml insulin                                                   | 1 uM RA                                                         | 5.5 ug/ml transferrin<br>6.7 ng/ml selenium                                                                                                                                                                                                                                                                                                                               |
| Baert et al.       | 2019 | 5-7 dpp mouse TCs, >7 dpp interstitial cells        | 3D printed Alginate-RGD scaffold                                  | 35 days | Cellular aggregates                    | ES                 | Alpha-MEM                      | 10% KSR          | -                                              | -             | 10 <sup>-7</sup> M Melatonin                                                       | -                                                               | 1x Glutamax                                                                                                                                                                                                                                                                                                                                                               |

CGM, collagen gel-Matrigel; ddp, days postpartum; DHT, dihydrotestosterone; ES, elongates spermatids; GFR, growth factor reduced; LGS, layer-gradient system; LN, laminin; NEAA, non-essential amino-acids; PLGA, poly(D,L-lactic-co-glycolic acid); PaS, pachytene spermatocytes; PMDS, polydimethylsiloxane; PTMC, peritubular myoid cells; RS, round spermatids; SACS, soft-agarose culture system; SC, Sertoli cells; SG, spermatogonia; ST, seminiferous tubules; TC, testicular cells
